# Supplementary material
Source: PubMed Central journal article supplement (PMC2840804)
Supplement: me.2009-0424_1.pdf [file me.2009-0424_1.pdf]

## **Supplemental movies**

**Supplemental Movie 1:** Femur from a 20-week-old ColI/Rs1-lateCon mouse that received RS67333 continuously for 10 weeks shows a dramatic expansion of trabecular bone that encases the normal pre-existing bone structures.

**Supplemental Movie 2:** Femur from a 20-week-old wildtype littermate mouse that received RS67333 continuously for 10 weeks shows no bony effects of drug treatment.

**Supplemental Movie 3:** Femur from a 20-week-old ColI/Rs1-late mouse that received vehicle only for 10 weeks.

**Supplemental Movie 4:** Femur from a 20-week-old wildtype littermate mouse that received vehicle only for 10 weeks.
